# Supplementary material for: Conceptualising a Socially Resilient Multi-Dimensional Framework for Bottom-Up Evaluation of Community Participation Mechanism in a Watershed Management Space
Source: Research Square preprint supplement (doi:10.21203/rs.3.rs-262135/v1), 2021-06-28
Supplement: Supplementary file 1 [file 283fbbeb60d89a1495179b41.xlsx]

## Sheet: Title
Data sheets
Paper	Conceptualising a Socially Resilient Multi-Dimensional Framework for Bottom-up Evaluation of Community Participation Mechanism in a Watershed Management Space
Submitted to	Environmental Processes
Authors	Bhabesh Msahanta, Arup Kumar Sarma, Sashindra Kumar Kakoty
Affiliations	Indian InstituteofTechnology, Guwahati
Primary data summarised
Groups		Academic		Water Resource Officers							Monitoring			Field Exp				Locals
Names		Bipul	Mimi	Niranjan	Apurba	Pulak	Amarendra	Deba Ch	Rudra	Dilip Dek	Prasanta	Naba		Siddhratha	Dilip Halo	Harsha	Indrajit	Nirmal	PK Sarma	Hemanta	Durgeswar	Anil Das	M Sarma	Prbhat Ro	Deba Das	Dhaneswa	Pramod	Kiran Das	Ajit Das	Sundar	Ramcharan	Dhan						1	2
Domains under the constructs	Variables/ actions
OA1- Villages/ Local governments like Gram Sabha operation	Q1-OA1-a: Numbers of villages covered	2	2	2	2	2	2	2	2	2	2	2		2	2	2	2	2	2	2	2	2	2	2	2	2	2	2	2	2	2	2
	Q2-OA1-b: Villagers’ activeness and willingness to continue	2	2	2	2	2	2	2	2	2	2	2		2	2	2	2	2	2	2	2	2	2	2	2	2	2	2	2	2	2	2
OA2- Water Users’ Group Operation	Q3-OA2-a: Proper mode of users group selection.	2	2	2	2	2	2	2	2	2	2	2		2	2	2	2	2	2	2	2	2	2	2	2	2	2	2	2	2	2	2				Krippendorff's Alpha Gr1
	Q4-OA2-b: Merit-based selection.	2	2	2	2	1	1	1	1	2	1	1		1	1	1	1	1	1	1	1	1	1	1	1	1	1	1	1	1	1	1
	Q5-OA2-c: Provision of organizational training.	2	2	2	2	2	2	2	2	2	2	2		2	2	2	2	2	2	2	2	2	2	2	2	2	2	2	2	2	2	2				Alpha	0.05
	Q6-OA2-d: Users activeness and willingness to continue.	2	2	2	2	2	2	2	2	2	2	2		2	2	2	2	2	2	2	2	2	2	2	2	2	2	2	2	2	2	2				Subj Factor	0
OA3- Watershed Developmental Committee Operation	Q7-OA3-a: Proper mode of WDC selection	2	2	2	2	2	2	2	2	2	2	2		2	2	2	2	2	2	2	2	2	2	2	2	2	2	2	2	2	1	1				Rater Factor	0
	Q8-OA3-b: Merit-based selection.	1	1	2	2	2	2	2	2	1	1	1		1	1	1	1	1	1	1	1	1	1	1	1		1	1	1	1	1	1
	Q9-OA3-c: Provision of organizational training.	2	2	2	2	2	2	2	2	2	2	2		2	2	2	2	2	2	2	2	2	2	2	2	2	2	2	2	2	2	2				#NAME?	#NAME?
	Q10-OA3-d: Willingness to continue.	2	2	2	2	2	2	2	2	2	2	2		2	2	2	2	2	2	2	2	2	2	2	2	2	2	2	2	2	2	2				#NAME?	#NAME?
OA4- Watershed Development Team Operation	Q11-OA4-a: Adequate formation of the watershed technical team	2	2	2	2	2	2	2	2	2	2	1		1	1	1	1	1	1	1	1	1	1	1	1	1	1	1	1	1	1	1				#NAME?	#NAME?
	Q12-OA4-b: Attentiveness of the watershed technical team to local problems.	2	2	2	2	2	2	2	2	2	2	2		2	2	2	2	2	2	2	2	2	2	2	2	2	2	2	2	2	2	2				#NAME?	#NAME?
	Q13-OA4-c: Promptness of the watershed technical team to service.	2	2	2	2	2	2	2	2	2	2	2		2	2	2	2	2	2	2	2	2	2	2	2	2	2	2	2	2	2	2				#NAME?	#NAME?
	Q14-OA4-d: Participation of the watershed technical team in planning and budgeting.	2	2	2	2	2	2	2	2	2	2	2		2	2	1	1	1	1	1	1	1	1	1	1	1	1	1	1	1	1	1				#NAME?	#NAME?
	Q15-OA4-e: Coordination of the watershed technical team in auditing.	2	2	2	2	2	2	2	2	2	2	2		2	2	2	2	2	2	2	2	2	2	2	2	2	2	2	2	2	2	2				#NAME?	#NAME?
	Q16-OA4-f: Coordination of the watershed technical team in project actions.	2	2	2	2	2	2	2	2	2	2	2		2	2	2	2	2	2	2	2	2	2	2	2	2	2	2	2	2	2	2
OA5- Self Help Group Operation	Q17-OA5-a: Active association by SHGs.	2	2	2	2	2	2	2	2	2	2	2		2	2	2	2	2	2	2	2	2	2	2	2	2	2	2	2	2	2	2
	Q18-OA5-b: Periodic training about their roles.	2	2	2	2	2	2	2	2	2	2	2		2	2	2	2	2	2	2	2	2	2	2	2	2	2	2	2	2	2	2				Krippendorff's Alpha Gr2
	Q19-OA5-c: Willingness for inter-group cooperation.	2	2	2	2	2	2	2	2	2	2	2		2	2	2	2	2	2	2	2	2	2	2	2	2	2	2	2	2	2	2
	Q20-OA5-d: Willingness for helping problem mitigation.	2	2	2	2	2	2	2	2	2	2	2		2	2	2	2	2	2	2	2	2	2	2	2	2	2	2	2	2	2	2				Alpha	0.05
CMA1- Organisational Domain Management	Q21-CMA1-a: Well defined mode of transfer/ role allocation/authority sharing from providers and participants.	2	2	2	2	2	2	2	2	2	2	2		2	2	2	2	2	2	2	2	2	2	2	2	2	2	2	2	2	2	2				Subj Factor	0
	Q22-CMA1-b: Contract flexibility between providers and participants.	2	2	2	2	2	1	1	1	1	1	1		1	1	1	1	1	1	1	1	1	1	1	1	1	1	1	1	1	1	1				Rater Factor	0
CMA2- Technical Domain Management	Q23-CMA2-a: The project being technically manageable by the users.	2	2	2	2	2	2	2	2	2	2	2		2	2	2	2	2	2	2	2	2	2	2	2	2	2	2	2	2	2	2
	Q24-CMA2-b: Provision of differential service and supply facility for the users.	2	2	2	2	2	2	2	2	2	2	2		2	2	2	2	2	2	2	2	2	2	2	2	2	2	2	2	2	2	2				#NAME?	#NAME?
	Q25-CMA2-c: Provision for Definite and measurable service quality.	2	2	2	2	1	1	1	1	1	1	1		1	1	1	1	1	1	1	1	1	1	1	1	1	1	1	1	1	1	1				#NAME?	#NAME?
	Q26-CMA2-d: Power availability.	2	2	2	2	2	2	2	2	2	1	1		1	1	1	1	1	1	1	1	1	1	1	1	1	1	1	1	1	1	1				#NAME?	#NAME?
	Q27-CMA2-e: Scheduling and timeliness.	2	2	2	2	2	2	2	2	2	2	2		2	2	2	2	2	2	2	2	2	2	2	2	2	2	2	2	2	2	2				#NAME?	#NAME?
	Q28-CMA2-f: Scope of innovation and adaptability.	2	2	2	2	2	2	2	2	2	2	2		2	2	2	2	2	2	2	2	2	2	2	2	2	2	2	2	2	2	2				#NAME?	#NAME?
CMA3- Legal/Institutional Domain Management	Q29-CMA3-a: Legality and flexibility of pricing	2	2	2	2	2	2	2	2	2	2	2		2	2	2	2	2	2	2	2	2	2	2	2	2	2	2	2	2	2	2				#NAME?	#NAME?
	Q30-CMA3-b: Compatibility of rules and norms with the statute and common law practices.	2	2	2	2	2	2	2	2	2	2	2		2	2	2	2	2	2	2	2	2	2	2	2	2	2	2	2	2	2	2				#NAME?	#NAME?
	Q31-CMA3-c: Scope of dispute management.	2	2	2	2	2	2	2	2	2	2	2		2	2	2	2	2	2	2	2	2	2	2	2	2	2	2	2	2	2	2
	Q32-CMA3-d: Provision of distinct authority sharing.	2	2	2	2	2	2	2	2	2	2	2		2	2	2	2	2	2	2	2	2	2	2	2	2	2	2	2	2	2	2
	Q33-CMA3-e: Secured land tenure policy.	2	2	2	2	2	2	2	2	2	2	2		2	2	2	2	2	2	2	2	2	2	2	2	2	2	2	2	2	2	2
	Q34-CMA3-f: Government support in rules and legality.	2	2	2	2	2	2	2	2	2	2	2		2	2	2	2	2	2	2	2	2	2	2	2	2	2	2	2	2	2	2
	Q35-CMA3-g: Resilience to political sensitivity.	2	2	2	2	2	2	2	2	2	2	2		2	2	2	2	2	2	2	2	2	2	2	2	2	2	2	2	2	2	2
CMA4- Financial Domain Management	Q36-CMA4-a: Awareness of community about financing mode/investment opportunities	2	2	2	2	2	2	2	2	2	2	2		2	2	2	2	2	2	2	2	2	2	2	2	2	2	2	2	2	2	2
	Q37-CMA4-b: Awareness of community about the profitability of the project.	2	2	2	2	2	2	2	2	2	2	2		2	2	2	2	2	2	2	2	2	2	2	2	2	2	2	2	2	2	2
	Q38-CMA4-c: Community adopting the accounting/auditing practices	2	2	2	2	2	2	2	2	2	2	2		2	2	2	2	2	2	2	2	2	2	2	2	2	2	2	2	2	2	2
	Q39-CMA4-d: Awareness of community about the project B/C ratio	2	2	2	2	2	2	2	2	2	2	2		2	2	2	2	2	2	2	2	2	2	2	2	2	2	2	2	2	2	2
	Q40-CMA4-e: Faith of community about the stability of financial policies	2	2	2	2	2	2	2	2	2	2	2		2	2	2	2	2	2	2	2	2	2	2	2	2	2	2	2	2	2	2
	Q41-CMA4-f: The financial appeal of the project to the community.	2	2	2	2	2	2	2	2	2	2	2		2	2	2	2	2	2	2	2	2	2	2	2	2	2	2	2	2	2	2
	Q42-CMA4-g: Scope for private funding in the project	1	1	1	1	1	1	1	1	1	1	1		1	1	1	1	1	1	1	2	2	2	2	2	2	1	1	1	1	1	1
CMA5- Economic Domain Management	Q43-CMA5-a: Existence of feasibility study before project planning.	2	2	2	2	2	2	2	2	2	2	2		2	2	2	2	2	2	2	2	2	2	2	2	2	2	2	2	2	2	2
	Q44-CMA5-b: Existence of demand forecasting in project planning.	2	2	2	2	2	2	2	2	2	2	2		1	1	1	1	1	1	1	1	1	1	1	1	1	1	2	2	2	2	2
	Q45-CMA5-c: Effectiveness of the project for meeting long term demand.	2	2	2	2	2	2	2	2	2	2	2		2	2	2	2	2	2	2	2	2	2	2	2	2	2	2	2	2	2	2
	Q46-CMA5-d: Scope of extension service delivery.	2	2	2	2	2	2	2	2	2	2	2		2	2	2	2	2	2	2	2	2	2	2	2	2	2	2	2	2	2	2
	Q47-CMA5-e: Scope of common-pool resource management.	2	2	2	1	1	1	1	1	1	1	1		2	1	1	1	1	1	1	1	1	1	1	1	1	1	1	1	1	1	1
	Q48-CMA5-f: Scope for financial auditing.	2	2	2	2	2	2	2	2	2	2	2		2	2	2	2	2	2	2	2	2	2	2	2	2	2	2	2	2	2	2
	Q49-CMA5-g: Project inducing stability to the economic environment.	2	2	2	2	2	2	2	2	2	2	2		2	2	2	2	2	2	2	2	2	2	2	2	2	2	2	2	2	2	2
CMA6- Socio-Cultural Domain Management	Q50-CMA6-a: Value addition to the socio-cultural cohesion.	2	2	2	2	2	2	2	2	2	2	2		2	2	2	2	2	2	2	2	2	2	2	2	2	2	2	2	2	2	2
	Q51-CMA6-b: Equitable service delivery	2	2	2	2	2	2	2	2	2	2	2		2	2	2	2	2	2	2	2	2	2	2	2	2	2	2	2	2	2	2
	Q52-CMA6-c: Inducing jobs opportunities.	2	2	2	2	2	2	2	2	2	2	2		2	2	2	2	2	2	2	2	2	2	2	2	2	2	2	2	2	2	2
	Q53-CMA6-d: Effective rehabilitation/ compensation policies	2	2	2	2	2	2	2	2	2	2	2		2	2	2	2	2	2	2	2	2	2	2	2	2	2	2	2	2	2	2
	Q54-CMA6-e: Scoping for social return on investment.	2	2	2	2	2	1	1	1	1	1	1		1	1	1	1	1	1	1	1	1	1	1	1	1	1	1	1	1	1	1
	Q55-CMA6-f: Acceptable tariffs/ levies.	2	2	2	2	2	2	2	2	2	2	2		2	2	2	2	2	2	2	2	2	2	2	2	2	2	2	2	2	2	2
	Q56-CMA6-g: Encouraging constructive migration of people	2	2	2	2	2	2	2	2	2	2	2		2	2	2	2	2	2	2	2	2	2	2	2	2	2	2	2	2	2	2
CMA7- Environmental Domain Management	Q57-CMA7-a: Initiating environmental sustainability.	2	2	2	2	2	2	2	2	2	2	2		2	2	2	2	2	2	2	2	2	2	2	2	2	2	2	2	2	2	2
	Q58-CMA7-b: Inducing soil degradation prevention	2	2	2	2	2	2	2	2	2	2	2		2	2	2	2	2	2	2	2	2	2	2	2	2	2	2	2	2	2	2
	Q59-CMA7-c: Emphasise for pollution prevention.	2	2	2	2	2	2	2	2	2	2	2		2	2	2	2	2	2	2	2	2	2	2	2	2	2	2	2	2	2	2
CMA8- Developmental Domain Management	Q60-CMA8-a: Arranging developmental training and workshops for stakeholders.	2	2	2	2	2	2	2	2	2	2	2		2	2	2	2	2	2	2	2	2	2	2	2	2	2	2	2	2	2	2
	Q61-CMA8-b: Demonstrating evidence of enhanced capability/ resource utilisation.	2	2	2	2	2	2	2	2	2	2	2		2	2	2	2	2	2	2	2	2	2	2	2	2	2	2	2	2	2	2
	Q62-CMA8-c: Encouraging Case study/ analysis/ qualitative feedback amongst stakeholders.	2	2	2	2	2	2	2	2	2	2	2		2	2	2	2	2	2	2	2	2	2	2	2	2	2	2	2	2	2	2
	Q63-CMA8-d: Effort for controlling staff/ stakeholders performance/ engagements.	2	2	2	2	2	2	2	2	2	2	2		2	2	2	2	2	2	2	2	2	2	2	2	2	2	2	2	2	2	2
	Q64-CMA8-e: Scoping knowledge/ best practices management.	2	2	2	2	2	2	2	2	2	2	2		2	2	2	2	2	2	2	2	2	2	2	2	2	2	2	2	2	2	2
	Q65-CMA8-f: Introducing rating policy.	2	2	2	2	2	1	1	1	1	1	1		1	1	1	1	1	1	1	1	1	1	1	1	1	1	1	1	1	1	1

## Sheet: Krippendorf
Groups		Academic		Water Resource Officers							Monitoring			Field Exp				Locals
Names		Bipul	Mimi	Niranjan	Apurba	Pulak	Amarendra	Deba Ch	Rudra	Dilip Dek	Prasanta	Naba		Siddhratha	Dilip Halo	Harsha	Indrajit	Nirmal	PK Sarma	Hemanta	Durgeswar	Anil Das	M Sarma	Prbhat Ro	Deba Das	Dhaneswa	Pramod	Kiran Das	Ajit Das	Sundar	Ramcharan	Dhan						1	2
Domains under the constructs	Variables/ actions
OA1- Villages/ Local governments like Gram Sabha operation	Q1-OA1-a: Numbers of villages covered	2	2	2	2	2	2	2	2	2	2	2		2	2	2	2	2	2	2	2	2	2	2	2	2	2	2	2	2	2	2
	Q2-OA1-b: Villagers’ activeness and willingness to continue	2	2	2	2	2	2	2	2	2	2	2		2	2	2	2	2	2	2	2	2	2	2	2	2	2	2	2	2	2	2
OA2- Water Users’ Group Operation	Q3-OA2-a: Proper mode of users group selection.	2	2	2	2	2	2	2	2	2	2	2		2	2	2	2	2	2	2	2	2	2	2	2	2	2	2	2	2	2	2				Krippendorff's Alpha Gr1
	Q4-OA2-b: Merit-based selection.	2	2	2	2	1	1	1	1	2	1	1		1	1	1	1	1	1	1	1	1	1	1	1	1	1	1	1	1	1	1
	Q5-OA2-c: Provision of organizational training.	2	2	2	2	2	2	2	2	2	2	2		2	2	2	2	2	2	2	2	2	2	2	2	2	2	2	2	2	2	2				Alpha	0.05
	Q6-OA2-d: Users activeness and willingness to continue.	2	2	2	2	2	2	2	2	2	2	2		2	2	2	2	2	2	2	2	2	2	2	2	2	2	2	2	2	2	2				Subj Factor	0
OA3- Watershed Developmental Committee Operation	Q7-OA3-a: Proper mode of WDC selection	2	2	2	2	2	2	2	2	2	2	2		2	2	2	2	2	2	2	2	2	2	2	2	2	2	2	2	2	1	1				Rater Factor	0
	Q8-OA3-b: Merit-based selection.	1	1	2	2	2	2	2	2	1	1	1		1	1	1	1	1	1	1	1	1	1	1	1		1	1	1	1	1	1
	Q9-OA3-c: Provision of organizational training.	2	2	2	2	2	2	2	2	2	2	2		2	2	2	2	2	2	2	2	2	2	2	2	2	2	2	2	2	2	2				#NAME?	#NAME?
	Q10-OA3-d: Willingness to continue.	2	2	2	2	2	2	2	2	2	2	2		2	2	2	2	2	2	2	2	2	2	2	2	2	2	2	2	2	2	2				#NAME?	#NAME?
OA4- Watershed Development Team Operation	Q11-OA4-a: Adequate formation of the watershed technical team	2	2	2	2	2	2	2	2	2	2	1		1	1	1	1	1	1	1	1	1	1	1	1	1	1	1	1	1	1	1				#NAME?	#NAME?
	Q12-OA4-b: Attentiveness of the watershed technical team to local problems.	2	2	2	2	2	2	2	2	2	2	2		2	2	2	2	2	2	2	2	2	2	2	2	2	2	2	2	2	2	2				#NAME?	#NAME?
	Q13-OA4-c: Promptness of the watershed technical team to service.	2	2	2	2	2	2	2	2	2	2	2		2	2	2	2	2	2	2	2	2	2	2	2	2	2	2	2	2	2	2				#NAME?	#NAME?
	Q14-OA4-d: Participation of the watershed technical team in planning and budgeting.	2	2	2	2	2	2	2	2	2	2	2		2	2	1	1	1	1	1	1	1	1	1	1	1	1	1	1	1	1	1				#NAME?	#NAME?
	Q15-OA4-e: Coordination of the watershed technical team in auditing.	2	2	2	2	2	2	2	2	2	2	2		2	2	2	2	2	2	2	2	2	2	2	2	2	2	2	2	2	2	2				#NAME?	#NAME?
	Q16-OA4-f: Coordination of the watershed technical team in project actions.	2	2	2	2	2	2	2	2	2	2	2		2	2	2	2	2	2	2	2	2	2	2	2	2	2	2	2	2	2	2
OA5- Self Help Group Operation	Q17-OA5-a: Active association by SHGs.	2	2	2	2	2	2	2	2	2	2	2		2	2	2	2	2	2	2	2	2	2	2	2	2	2	2	2	2	2	2
	Q18-OA5-b: Periodic training about their roles.	2	2	2	2	2	2	2	2	2	2	2		2	2	2	2	2	2	2	2	2	2	2	2	2	2	2	2	2	2	2				Krippendorff's Alpha Gr2
	Q19-OA5-c: Willingness for inter-group cooperation.	2	2	2	2	2	2	2	2	2	2	2		2	2	2	2	2	2	2	2	2	2	2	2	2	2	2	2	2	2	2
	Q20-OA5-d: Willingness for helping problem mitigation.	2	2	2	2	2	2	2	2	2	2	2		2	2	2	2	2	2	2	2	2	2	2	2	2	2	2	2	2	2	2				Alpha	0.05
CMA1- Organisational Domain Management	Q21-CMA1-a: Well defined mode of transfer/ role allocation/authority sharing from providers and participants.	2	2	2	2	2	2	2	2	2	2	2		2	2	2	2	2	2	2	2	2	2	2	2	2	2	2	2	2	2	2				Subj Factor	0
	Q22-CMA1-b: Contract flexibility between providers and participants.	2	2	2	2	2	1	1	1	1	1	1		1	1	1	1	1	1	1	1	1	1	1	1	1	1	1	1	1	1	1				Rater Factor	0
CMA2- Technical Domain Management	Q23-CMA2-a: The project being technically manageable by the users.	2	2	2	2	2	2	2	2	2	2	2		2	2	2	2	2	2	2	2	2	2	2	2	2	2	2	2	2	2	2
	Q24-CMA2-b: Provision of differential service and supply facility for the users.	2	2	2	2	2	2	2	2	2	2	2		2	2	2	2	2	2	2	2	2	2	2	2	2	2	2	2	2	2	2				#NAME?	#NAME?
	Q25-CMA2-c: Provision for Definite and measurable service quality.	2	2	2	2	1	1	1	1	1	1	1		1	1	1	1	1	1	1	1	1	1	1	1	1	1	1	1	1	1	1				#NAME?	#NAME?
	Q26-CMA2-d: Power availability.	2	2	2	2	2	2	2	2	2	1	1		1	1	1	1	1	1	1	1	1	1	1	1	1	1	1	1	1	1	1				#NAME?	#NAME?
	Q27-CMA2-e: Scheduling and timeliness.	2	2	2	2	2	2	2	2	2	2	2		2	2	2	2	2	2	2	2	2	2	2	2	2	2	2	2	2	2	2				#NAME?	#NAME?
	Q28-CMA2-f: Scope of innovation and adaptability.	2	2	2	2	2	2	2	2	2	2	2		2	2	2	2	2	2	2	2	2	2	2	2	2	2	2	2	2	2	2				#NAME?	#NAME?
CMA3- Legal/Institutional Domain Management	Q29-CMA3-a: Legality and flexibility of pricing	2	2	2	2	2	2	2	2	2	2	2		2	2	2	2	2	2	2	2	2	2	2	2	2	2	2	2	2	2	2				#NAME?	#NAME?
	Q30-CMA3-b: Compatibility of rules and norms with the statute and common law practices.	2	2	2	2	2	2	2	2	2	2	2		2	2	2	2	2	2	2	2	2	2	2	2	2	2	2	2	2	2	2				#NAME?	#NAME?
	Q31-CMA3-c: Scope of dispute management.	2	2	2	2	2	2	2	2	2	2	2		2	2	2	2	2	2	2	2	2	2	2	2	2	2	2	2	2	2	2
	Q32-CMA3-d: Provision of distinct authority sharing.	2	2	2	2	2	2	2	2	2	2	2		2	2	2	2	2	2	2	2	2	2	2	2	2	2	2	2	2	2	2
	Q33-CMA3-e: Secured land tenure policy.	2	2	2	2	2	2	2	2	2	2	2		2	2	2	2	2	2	2	2	2	2	2	2	2	2	2	2	2	2	2
	Q34-CMA3-f: Government support in rules and legality.	2	2	2	2	2	2	2	2	2	2	2		2	2	2	2	2	2	2	2	2	2	2	2	2	2	2	2	2	2	2
	Q35-CMA3-g: Resilience to political sensitivity.	2	2	2	2	2	2	2	2	2	2	2		2	2	2	2	2	2	2	2	2	2	2	2	2	2	2	2	2	2	2
CMA4- Financial Domain Management	Q36-CMA4-a: Awareness of community about financing mode/investment opportunities	2	2	2	2	2	2	2	2	2	2	2		2	2	2	2	2	2	2	2	2	2	2	2	2	2	2	2	2	2	2
	Q37-CMA4-b: Awareness of community about the profitability of the project.	2	2	2	2	2	2	2	2	2	2	2		2	2	2	2	2	2	2	2	2	2	2	2	2	2	2	2	2	2	2
	Q38-CMA4-c: Community adopting the accounting/auditing practices	2	2	2	2	2	2	2	2	2	2	2		2	2	2	2	2	2	2	2	2	2	2	2	2	2	2	2	2	2	2
	Q39-CMA4-d: Awareness of community about the project B/C ratio	2	2	2	2	2	2	2	2	2	2	2		2	2	2	2	2	2	2	2	2	2	2	2	2	2	2	2	2	2	2
	Q40-CMA4-e: Faith of community about the stability of financial policies	2	2	2	2	2	2	2	2	2	2	2		2	2	2	2	2	2	2	2	2	2	2	2	2	2	2	2	2	2	2
	Q41-CMA4-f: The financial appeal of the project to the community.	2	2	2	2	2	2	2	2	2	2	2		2	2	2	2	2	2	2	2	2	2	2	2	2	2	2	2	2	2	2
	Q42-CMA4-g: Scope for private funding in the project	1	1	1	1	1	1	1	1	1	1	1		1	1	1	1	1	1	1	2	2	2	2	2	2	1	1	1	1	1	1
CMA5- Economic Domain Management	Q43-CMA5-a: Existence of feasibility study before project planning.	2	2	2	2	2	2	2	2	2	2	2		2	2	2	2	2	2	2	2	2	2	2	2	2	2	2	2	2	2	2
	Q44-CMA5-b: Existence of demand forecasting in project planning.	2	2	2	2	2	2	2	2	2	2	2		1	1	1	1	1	1	1	1	1	1	1	1	1	1	2	2	2	2	2
	Q45-CMA5-c: Effectiveness of the project for meeting long term demand.	2	2	2	2	2	2	2	2	2	2	2		2	2	2	2	2	2	2	2	2	2	2	2	2	2	2	2	2	2	2
	Q46-CMA5-d: Scope of extension service delivery.	2	2	2	2	2	2	2	2	2	2	2		2	2	2	2	2	2	2	2	2	2	2	2	2	2	2	2	2	2	2
	Q47-CMA5-e: Scope of common-pool resource management.	2	2	2	1	1	1	1	1	1	1	1		2	1	1	1	1	1	1	1	1	1	1	1	1	1	1	1	1	1	1
	Q48-CMA5-f: Scope for financial auditing.	2	2	2	2	2	2	2	2	2	2	2		2	2	2	2	2	2	2	2	2	2	2	2	2	2	2	2	2	2	2
	Q49-CMA5-g: Project inducing stability to the economic environment.	2	2	2	2	2	2	2	2	2	2	2		2	2	2	2	2	2	2	2	2	2	2	2	2	2	2	2	2	2	2
CMA6- Socio-Cultural Domain Management	Q50-CMA6-a: Value addition to the socio-cultural cohesion.	2	2	2	2	2	2	2	2	2	2	2		2	2	2	2	2	2	2	2	2	2	2	2	2	2	2	2	2	2	2
	Q51-CMA6-b: Equitable service delivery	2	2	2	2	2	2	2	2	2	2	2		2	2	2	2	2	2	2	2	2	2	2	2	2	2	2	2	2	2	2
	Q52-CMA6-c: Inducing jobs opportunities.	2	2	2	2	2	2	2	2	2	2	2		2	2	2	2	2	2	2	2	2	2	2	2	2	2	2	2	2	2	2
	Q53-CMA6-d: Effective rehabilitation/ compensation policies	2	2	2	2	2	2	2	2	2	2	2		2	2	2	2	2	2	2	2	2	2	2	2	2	2	2	2	2	2	2
	Q54-CMA6-e: Scoping for social return on investment.	2	2	2	2	2	1	1	1	1	1	1		1	1	1	1	1	1	1	1	1	1	1	1	1	1	1	1	1	1	1
	Q55-CMA6-f: Acceptable tariffs/ levies.	2	2	2	2	2	2	2	2	2	2	2		2	2	2	2	2	2	2	2	2	2	2	2	2	2	2	2	2	2	2
	Q56-CMA6-g: Encouraging constructive migration of people	2	2	2	2	2	2	2	2	2	2	2		2	2	2	2	2	2	2	2	2	2	2	2	2	2	2	2	2	2	2
CMA7- Environmental Domain Management	Q57-CMA7-a: Initiating environmental sustainability.	2	2	2	2	2	2	2	2	2	2	2		2	2	2	2	2	2	2	2	2	2	2	2	2	2	2	2	2	2	2
	Q58-CMA7-b: Inducing soil degradation prevention	2	2	2	2	2	2	2	2	2	2	2		2	2	2	2	2	2	2	2	2	2	2	2	2	2	2	2	2	2	2
	Q59-CMA7-c: Emphasise for pollution prevention.	2	2	2	2	2	2	2	2	2	2	2		2	2	2	2	2	2	2	2	2	2	2	2	2	2	2	2	2	2	2
CMA8- Developmental Domain Management	Q60-CMA8-a: Arranging developmental training and workshops for stakeholders.	2	2	2	2	2	2	2	2	2	2	2		2	2	2	2	2	2	2	2	2	2	2	2	2	2	2	2	2	2	2
	Q61-CMA8-b: Demonstrating evidence of enhanced capability/ resource utilisation.	2	2	2	2	2	2	2	2	2	2	2		2	2	2	2	2	2	2	2	2	2	2	2	2	2	2	2	2	2	2
	Q62-CMA8-c: Encouraging Case study/ analysis/ qualitative feedback amongst stakeholders.	2	2	2	2	2	2	2	2	2	2	2		2	2	2	2	2	2	2	2	2	2	2	2	2	2	2	2	2	2	2
	Q63-CMA8-d: Effort for controlling staff/ stakeholders performance/ engagements.	2	2	2	2	2	2	2	2	2	2	2		2	2	2	2	2	2	2	2	2	2	2	2	2	2	2	2	2	2	2
	Q64-CMA8-e: Scoping knowledge/ best practices management.	2	2	2	2	2	2	2	2	2	2	2		2	2	2	2	2	2	2	2	2	2	2	2	2	2	2	2	2	2	2
	Q65-CMA8-f: Introducing rating policy.	2	2	2	2	2	1	1	1	1	1	1		1	1	1	1	1	1	1	1	1	1	1	1	1	1	1	1	1	1	1

## Sheet: Agreement
Groups	Names	Domains under the constructs	OA1- Villages/ Local governments like Gram Sabha operation		OA2- Water Users’ Group Operation				OA3- Watershed Developmental Committee Operation				OA4- Watershed Development Team Operation						OA5- Self Help Group Operation				CMA1- Organisational Domain Management		CMA2- Technical Domain Management						CMA3- Legal/Institutional Domain Management							CMA4- Financial Domain Management							CMA5- Economic Domain Management
		Variables/ actions	Q1-OA1-a: Numbers of villages covered	Q2-OA1-b: Villagers’ activeness and willingness to continue	Q3-OA2-a: Proper mode of users group selection.	Q4-OA2-b: Merit-based selection.	Q5-OA2-c: Provision of organizational training.	Q6-OA2-d: Users activeness and willingness to continue.	Q7-OA3-a: Proper mode of WDC selection	Q8-OA3-b: Merit-based selection.	Q9-OA3-c: Provision of organizational training.	Q10-OA3-d: Willingness to continue.	Q11-OA4-a: Adequate formation of the watershed technical team	Q12-OA4-b: Attentiveness of the watershed technical team to local problems.	Q13-OA4-c: Promptness of the watershed technical team to service.	Q14-OA4-d: Participation of the watershed technical team in planning and budgeting.	Q15-OA4-e: Coordination of the watershed technical team in auditing.	Q16-OA4-f: Coordination of the watershed technical team in project actions.	Q17-OA5-a: Active association by SHGs.	Q18-OA5-b: Periodic training about their roles.	Q19-OA5-c: Willingness for inter-group cooperation.	Q20-OA5-d: Willingness for helping problem mitigation.	Q21-CMA1-a: Well defined mode of transfer/ role allocation/authority sharing from providers and participants.	Q22-CMA1-b: Contract flexibility between providers and participants.	Q23-CMA2-a: The project being technically manageable by the users.	Q24-CMA2-b: Provision of differential service and supply facility for the users.	Q25-CMA2-c: Provision for Definite and measurable service quality.	Q26-CMA2-d: Power availability.	Q27-CMA2-e: Scheduling and timeliness.	Q28-CMA2-f: Scope of innovation and adaptability.	Q29-CMA3-a: Legality and flexibility of pricing	Q30-CMA3-b: Compatibility of rules and norms with the statute and common law practices.	Q31-CMA3-c: Scope of dispute management.	Q32-CMA3-d: Provision of distinct authority sharing.	Q33-CMA3-e: Secured land tenure policy.	Q34-CMA3-f: Government support in rules and legality.	Q35-CMA3-g: Resilience to political sensitivity.	Q36-CMA4-a: Awareness of community about financing mode/investment opportunities	Q37-CMA4-b: Awareness of community about the profitability of the project.	Q38-CMA4-c: Community adopting the accounting/auditing practices	Q39-CMA4-d: Awareness of community about the project B/C ratio	Q40-CMA4-e: Faith of community about the stability of financial policies	Q41-CMA4-f: The financial appeal of the project to the community.	Q42-CMA4-g: Scope for private funding in the project	Q43-CMA5-a: Existence of feasibility study before project planning.	Q44-CMA5-b: Existence of demand forecasting in project planning.	Q45-CMA5-c: Effectiveness of the project for meeting long term demand.	Q46-CMA5-d: Scope of extension service delivery.	Q47-CMA5-e: Scope of common-pool resource management.
Academic	Bipul		2	2	2	2	2	2	2	1	2	2	2	2	2	2	2	2	2	2	2	2	2	2	2	2	2	2	2	2	2	2	2	2	2	2	2	2	2	2	2	2	2	1	2	2	2	2	2
	Mimi		2	2	2	2	2	2	2	1	2	2	2	2	2	2	2	2	2	2	2	2	2	2	2	2	2	2	2	2	2	2	2	2	2	2	2	2	2	2	2	2	2	1	2	2	2	2	2
Water Resource Officers	Niranjan		2	2	2	2	2	2	2	2	2	2	2	2	2	2	2	2	2	2	2	2	2	2	2	2	2	2	2	2	2	2	2	2	2	2	2	2	2	2	2	2	2	1	2	2	2	2	2
	Apurba		2	2	2	2	2	2	2	2	2	2	2	2	2	2	2	2	2	2	2	2	2	2	2	2	2	2	2	2	2	2	2	2	2	2	2	2	2	2	2	2	2	1	2	2	2	2	1
	Pulak		2	2	2	1	2	2	2	2	2	2	2	2	2	2	2	2	2	2	2	2	2	2	2	2	1	2	2	2	2	2	2	2	2	2	2	2	2	2	2	2	2	1	2	2	2	2	1
	Amarendra		2	2	2	1	2	2	2	2	2	2	2	2	2	2	2	2	2	2	2	2	2	1	2	2	1	2	2	2	2	2	2	2	2	2	2	2	2	2	2	2	2	1	2	2	2	2	1
	Deba Ch		2	2	2	1	2	2	2	2	2	2	2	2	2	2	2	2	2	2	2	2	2	1	2	2	1	2	2	2	2	2	2	2	2	2	2	2	2	2	2	2	2	1	2	2	2	2	1
	Rudra		2	2	2	1	2	2	2	2	2	2	2	2	2	2	2	2	2	2	2	2	2	1	2	2	1	2	2	2	2	2	2	2	2	2	2	2	2	2	2	2	2	1	2	2	2	2	1
	Dilip Dek		2	2	2	2	2	2	2	1	2	2	2	2	2	2	2	2	2	2	2	2	2	1	2	2	1	2	2	2	2	2	2	2	2	2	2	2	2	2	2	2	2	1	2	2	2	2	1
Monitoring	Prasanta		2	2	2	1	2	2	2	1	2	2	2	2	2	2	2	2	2	2	2	2	2	1	2	2	1	1	2	2	2	2	2	2	2	2	2	2	2	2	2	2	2	1	2	2	2	2	1
	Naba		2	2	2	1	2	2	2	1	2	2	1	2	2	2	2	2	2	2	2	2	2	1	2	2	1	1	2	2	2	2	2	2	2	2	2	2	2	2	2	2	2	1	2	2	2	2	1
Field Exp	Siddhratha		2	2	2	1	2	2	2	1	2	2	1	2	2	2	2	2	2	2	2	2	2	1	2	2	1	1	2	2	2	2	2	2	2	2	2	2	2	2	2	2	2	1	2	1	2	2	2
	Dilip Halo		2	2	2	1	2	2	2	1	2	2	1	2	2	2	2	2	2	2	2	2	2	1	2	2	1	1	2	2	2	2	2	2	2	2	2	2	2	2	2	2	2	1	2	1	2	2	1
	Harsha		2	2	2	1	2	2	2	1	2	2	1	2	2	1	2	2	2	2	2	2	2	1	2	2	1	1	2	2	2	2	2	2	2	2	2	2	2	2	2	2	2	1	2	1	2	2	1
	Indrajit		2	2	2	1	2	2	2	1	2	2	1	2	2	1	2	2	2	2	2	2	2	1	2	2	1	1	2	2	2	2	2	2	2	2	2	2	2	2	2	2	2	1	2	1	2	2	1
Locals	Nirmal		2	2	2	1	2	2	2	1	2	2	1	2	2	1	2	2	2	2	2	2	2	1	2	2	1	1	2	2	2	2	2	2	2	2	2	2	2	2	2	2	2	1	2	1	2	2	1
	PK Sarma		2	2	2	1	2	2	2	1	2	2	1	2	2	1	2	2	2	2	2	2	2	1	2	2	1	1	2	2	2	2	2	2	2	2	2	2	2	2	2	2	2	1	2	1	2	2	1
	Hemanta		2	2	2	1	2	2	2	1	2	2	1	2	2	1	2	2	2	2	2	2	2	1	2	2	1	1	2	2	2	2	2	2	2	2	2	2	2	2	2	2	2	1	2	1	2	2	1
	Durgeswar		2	2	2	1	2	2	2	1	2	2	1	2	2	1	2	2	2	2	2	2	2	1	2	2	1	1	2	2	2	2	2	2	2	2	2	2	2	2	2	2	2	2	2	1	2	2	1
	Anil Das		2	2	2	1	2	2	2	1	2	2	1	2	2	1	2	2	2	2	2	2	2	1	2	2	1	1	2	2	2	2	2	2	2	2	2	2	2	2	2	2	2	2	2	1	2	2	1
	M Sarma		2	2	2	1	2	2	2	1	2	2	1	2	2	1	2	2	2	2	2	2	2	1	2	2	1	1	2	2	2	2	2	2	2	2	2	2	2	2	2	2	2	2	2	1	2	2	1
	Prbhat Ro		2	2	2	1	2	2	2	1	2	2	1	2	2	1	2	2	2	2	2	2	2	1	2	2	1	1	2	2	2	2	2	2	2	2	2	2	2	2	2	2	2	2	2	1	2	2	1
	Deba Das		2	2	2	1	2	2	2	1	2	2	1	2	2	1	2	2	2	2	2	2	2	1	2	2	1	1	2	2	2	2	2	2	2	2	2	2	2	2	2	2	2	2	2	1	2	2	1
	Dhaneswa		2	2	2	1	2	2	2		2	2	1	2	2	1	2	2	2	2	2	2	2	1	2	2	1	1	2	2	2	2	2	2	2	2	2	2	2	2	2	2	2	2	2	1	2	2	1
	Pramod		2	2	2	1	2	2	2	1	2	2	1	2	2	1	2	2	2	2	2	2	2	1	2	2	1	1	2	2	2	2	2	2	2	2	2	2	2	2	2	2	2	1	2	1	2	2	1
	Kiran Das		2	2	2	1	2	2	2	1	2	2	1	2	2	1	2	2	2	2	2	2	2	1	2	2	1	1	2	2	2	2	2	2	2	2	2	2	2	2	2	2	2	1	2	2	2	2	1
	Ajit Das		2	2	2	1	2	2	2	1	2	2	1	2	2	1	2	2	2	2	2	2	2	1	2	2	1	1	2	2	2	2	2	2	2	2	2	2	2	2	2	2	2	1	2	2	2	2	1
	Sundar		2	2	2	1	2	2	2	1	2	2	1	2	2	1	2	2	2	2	2	2	2	1	2	2	1	1	2	2	2	2	2	2	2	2	2	2	2	2	2	2	2	1	2	2	2	2	1
	Ramcharan		2	2	2	1	2	2	1	1	2	2	1	2	2	1	2	2	2	2	2	2	2	1	2	2	1	1	2	2	2	2	2	2	2	2	2	2	2	2	2	2	2	1	2	2	2	2	1
	Dhan		2	2	2	1	2	2	1	1	2	2	1	2	2	1	2	2	2	2	2	2	2	1	2	2	1	1	2	2	2	2	2	2	2	2	2	2	2	2	2	2	2	1	2	2	2	2	1
Total Person with agreement in both Gr			30	30	30	5	30	30	28	6	30	30	10	30	30	13	30	30	30	30	30	30	30	5	30	30	4	9	30	30	30	30	30	30	30	30	30	30	30	30	30	30	30	6	30	16	30	30	4
Percentage of persons with agreement in both Gr			100	100	100	16.6667	100	100	93.3333	20	100	100	33.3333	100	100	43.3333	100	100	100	100	100	100	100	16.6667	100	100	13.3333	30	100	100	100	100	100	100	100	100	100	100	100	100	100	100	100	20	100	53.3333	100	100	13.3333
Total number of variables with full agreement Both Gr			52
Total number of variables with non-agreement Both Gr			13
Total Person with agreement in Gr1			11	11	11	5	11	11	11	6	11	11	10	11	11	11	11	11	11	11	11	11	11	5	11	11	4	9	11	11	11	11	11	11	11	11	11	11	11	11	11	11	11	0	11	11	11	11	3
Percentage of persons with agreement in Gr1			100	100	100	45.4545	100	100	100	54.5455	100	100	90.9091	100	100	100	100	100	100	100	100	100	100	45.4545	100	100	36.3636	81.8182	100	100	100	100	100	100	100	100	100	100	100	100	100	100	100	0	100	100	100	100	27.2727
Number of variables with full agreement in Gr1			55
Number of variables with non-agreement in Gr1			10
Total Person with agreement in Gr2			19	19	19	0	19	19	17	0	19	19	0	19	19	2	19	19	19	19	19	19	19	0	19	19	0	0	19	19	19	19	19	19	19	19	19	19	19	19	19	19	19	6	19	5	19	19	1
Percentage of persons with agreement in Gr2			100	100	100	0	100	100	89.4737	0	100	100	0	100	100	10.5263	100	100	100	100	100	100	100	0	100	100	0	0	100	100	100	100	100	100	100	100	100	100	100	100	100	100	100	31.5789	100	26.3158	100	100	5.26316
Number of variables with full agreement in Gr2			52
Number of variables with non-agreement in Gr2			13
Summary agreement Table
			By Both group	By Gr1	By Gr2
Number of variables with agreement			52	55	52
Number of variables with disagreement			13	10	13
Percentage of variables with agreement			80	84.6154	80
Percentage of variables with disagreement			20	15.3846	20
[truncated: 18 more columns]

## Sheet: Anova Cronbach Alpha
Groups		Academic		Water Resource Officers							Monitoring			Field Exp				Locals
Names		Bipul	Mimi	Niranjan	Apurba	Pulak	Amarendra	Deba Ch	Rudra	Dilip Dek	Prasanta	Naba		Siddhratha	Dilip Halo	Harsha	Indrajit	Nirmal	PK Sarma	Hemanta	Durgeswar	Anil Das	M Sarma	Prbhat Ro	Deba Das	Dhaneswa	Pramod	Kiran Das	Ajit Das	Sundar	Ramcharan	Dhan						1	2
Domains under the constructs	Variables/ actions
OA1- Villages/ Local governments like Gram Sabha operation	Q1-OA1-a: Numbers of villages covered	2	2	2	2	2	2	2	2	2	2	2		2	2	2	2	2	2	2	2	2	2	2	2	2	2	2	2	2	2	2				Cronbach's Alpha
	Q2-OA1-b: Villagers’ activeness and willingness to continue	2	2	2	2	2	2	2	2	2	2	2		2	2	2	2	2	2	2	2	2	2	2	2	2	2	2	2	2	2	2
OA2- Water Users’ Group Operation	Q3-OA2-a: Proper mode of users group selection.	2	2	2	2	2	2	2	2	2	2	2		2	2	2	2	2	2	2	2	2	2	2	2	2	2	2	2	2	2	2				#NAME?
	Q4-OA2-b: Merit-based selection.	2	2	2	2	1	1	1	1	2	1	1		1	1	1	1	1	1	1	1	1	1	1	1	1	1	1	1	1	1	1
	Q5-OA2-c: Provision of organizational training.	2	2	2	2	2	2	2	2	2	2	2		2	2	2	2	2	2	2	2	2	2	2	2	2	2	2	2	2	2	2				Cronbach's Alpha with missing item
	Q6-OA2-d: Users activeness and willingness to continue.	2	2	2	2	2	2	2	2	2	2	2		2	2	2	2	2	2	2	2	2	2	2	2	2	2	2	2	2	2	2
OA3- Watershed Developmental Committee Operation	Q7-OA3-a: Proper mode of WDC selection	2	2	2	2	2	2	2	2	2	2	2		2	2	2	2	2	2	2	2	2	2	2	2	2	2	2	2	2	1	1				#NAME?	#NAME?	#NAME?	#NAME?	#NAME?	#NAME?	#NAME?	#NAME?	#NAME?	#NAME?	#NAME?	#NAME?	#NAME?	#NAME?
	Q8-OA3-b: Merit-based selection.	1	1	2	2	2	2	2	2	1	1	1		1	1	1	1	1	1	1	1	1	1	1	1	1	1	1	1	1	1	1
	Q9-OA3-c: Provision of organizational training.	2	2	2	2	2	2	2	2	2	2	2		2	2	2	2	2	2	2	2	2	2	2	2	2	2	2	2	2	2	2
	Q10-OA3-d: Willingness to continue.	2	2	2	2	2	2	2	2	2	2	2		2	2	2	2	2	2	2	2	2	2	2	2	2	2	2	2	2	2	2				Krippendorff's Alpha Gr1
OA4- Watershed Development Team Operation	Q11-OA4-a: Adequate formation of the watershed technical team	2	2	2	2	2	2	2	2	2	2	1		1	1	1	1	1	1	1	1	1	1	1	1	1	1	1	1	1	1	1
	Q12-OA4-b: Attentiveness of the watershed technical team to local problems.	2	2	2	2	2	2	2	2	2	2	2		2	2	2	2	2	2	2	2	2	2	2	2	2	2	2	2	2	2	2				Alpha	0.05
	Q13-OA4-c: Promptness of the watershed technical team to service.	2	2	2	2	2	2	2	2	2	2	2		2	2	2	2	2	2	2	2	2	2	2	2	2	2	2	2	2	2	2				Subj Factor	0
	Q14-OA4-d: Participation of the watershed technical team in planning and budgeting.	2	2	2	2	2	2	2	2	2	2	2		2	2	1	1	1	1	1	1	1	1	1	1	1	1	1	1	1	1	1				Rater Factor	0
	Q15-OA4-e: Coordination of the watershed technical team in auditing.	2	2	2	2	2	2	2	2	2	2	2		2	2	2	2	2	2	2	2	2	2	2	2	2	2	2	2	2	2	2
	Q16-OA4-f: Coordination of the watershed technical team in project actions.	2	2	2	2	2	2	2	2	2	2	2		2	2	2	2	2	2	2	2	2	2	2	2	2	2	2	2	2	2	2				#NAME?	#NAME?
OA5- Self Help Group Operation	Q17-OA5-a: Active association by SHGs.	2	2	2	2	2	2	2	2	2	2	2		2	2	2	2	2	2	2	2	2	2	2	2	2	2	2	2	2	2	2				#NAME?	#NAME?
	Q18-OA5-b: Periodic training about their roles.	2	2	2	2	2	2	2	2	2	2	2		2	2	2	2	2	2	2	2	2	2	2	2	2	2	2	2	2	2	2				#NAME?	#NAME?
	Q19-OA5-c: Willingness for inter-group cooperation.	2	2	2	2	2	2	2	2	2	2	2		2	2	2	2	2	2	2	2	2	2	2	2	2	2	2	2	2	2	2				#NAME?	#NAME?
	Q20-OA5-d: Willingness for helping problem mitigation.	2	2	2	2	2	2	2	2	2	2	2		2	2	2	2	2	2	2	2	2	2	2	2	2	2	2	2	2	2	2				#NAME?	#NAME?
CMA1- Organisational Domain Management	Q21-CMA1-a: Well defined mode of transfer/ role allocation/authority sharing from providers and participants.	2	2	2	2	2	2	2	2	2	2	2		2	2	2	2	2	2	2	2	2	2	2	2	2	2	2	2	2	2	2				#NAME?	#NAME?
	Q22-CMA1-b: Contract flexibility between providers and participants.	2	2	2	2	2	1	1	1	1	1	1		1	1	1	1	1	1	1	1	1	1	1	1	1	1	1	1	1	1	1				#NAME?	#NAME?
CMA2- Technical Domain Management	Q23-CMA2-a: The project being technically manageable by the users.	2	2	2	2	2	2	2	2	2	2	2		2	2	2	2	2	2	2	2	2	2	2	2	2	2	2	2	2	2	2
	Q24-CMA2-b: Provision of differential service and supply facility for the users.	2	2	2	2	2	2	2	2	2	2	2		2	2	2	2	2	2	2	2	2	2	2	2	2	2	2	2	2	2	2
	Q25-CMA2-c: Provision for Definite and measurable service quality.	2	2	2	2	1	1	1	1	1	1	1		1	1	1	1	1	1	1	1	1	1	1	1	1	1	1	1	1	1	1				Krippendorff's Alpha Gr2
	Q26-CMA2-d: Power availability.	2	2	2	2	2	2	2	2	2	1	1		1	1	1	1	1	1	1	1	1	1	1	1	1	1	1	1	1	1	1
	Q27-CMA2-e: Scheduling and timeliness.	2	2	2	2	2	2	2	2	2	2	2		2	2	2	2	2	2	2	2	2	2	2	2	2	2	2	2	2	2	2				Alpha	0.05
	Q28-CMA2-f: Scope of innovation and adaptability.	2	2	2	2	2	2	2	2	2	2	2		2	2	2	2	2	2	2	2	2	2	2	2	2	2	2	2	2	2	2				Subj Factor	0
CMA3- Legal/Institutional Domain Management	Q29-CMA3-a: Legality and flexibility of pricing	2	2	2	2	2	2	2	2	2	2	2		2	2	2	2	2	2	2	2	2	2	2	2	2	2	2	2	2	2	2				Rater Factor	0
	Q30-CMA3-b: Compatibility of rules and norms with the statute and common law practices.	2	2	2	2	2	2	2	2	2	2	2		2	2	2	2	2	2	2	2	2	2	2	2	2	2	2	2	2	2	2
	Q31-CMA3-c: Scope of dispute management.	2	2	2	2	2	2	2	2	2	2	2		2	2	2	2	2	2	2	2	2	2	2	2	2	2	2	2	2	2	2				#NAME?	#NAME?
	Q32-CMA3-d: Provision of distinct authority sharing.	2	2	2	2	2	2	2	2	2	2	2		2	2	2	2	2	2	2	2	2	2	2	2	2	2	2	2	2	2	2				#NAME?	#NAME?
	Q33-CMA3-e: Secured land tenure policy.	2	2	2	2	2	2	2	2	2	2	2		2	2	2	2	2	2	2	2	2	2	2	2	2	2	2	2	2	2	2				#NAME?	#NAME?
	Q34-CMA3-f: Government support in rules and legality.	2	2	2	2	2	2	2	2	2	2	2		2	2	2	2	2	2	2	2	2	2	2	2	2	2	2	2	2	2	2				#NAME?	#NAME?
	Q35-CMA3-g: Resilience to political sensitivity.	2	2	2	2	2	2	2	2	2	2	2		2	2	2	2	2	2	2	2	2	2	2	2	2	2	2	2	2	2	2				#NAME?	#NAME?
CMA4- Financial Domain Management	Q36-CMA4-a: Awareness of community about financing mode/investment opportunities	2	2	2	2	2	2	2	2	2	2	2		2	2	2	2	2	2	2	2	2	2	2	2	2	2	2	2	2	2	2				#NAME?	#NAME?
	Q37-CMA4-b: Awareness of community about the profitability of the project.	2	2	2	2	2	2	2	2	2	2	2		2	2	2	2	2	2	2	2	2	2	2	2	2	2	2	2	2	2	2				#NAME?	#NAME?
	Q38-CMA4-c: Community adopting the accounting/auditing practices	2	2	2	2	2	2	2	2	2	2	2		2	2	2	2	2	2	2	2	2	2	2	2	2	2	2	2	2	2	2
	Q39-CMA4-d: Awareness of community about the project B/C ratio	2	2	2	2	2	2	2	2	2	2	2		2	2	2	2	2	2	2	2	2	2	2	2	2	2	2	2	2	2	2
	Q40-CMA4-e: Faith of community about the stability of financial policies	2	2	2	2	2	2	2	2	2	2	2		2	2	2	2	2	2	2	2	2	2	2	2	2	2	2	2	2	2	2
	Q41-CMA4-f: The financial appeal of the project to the community.	2	2	2	2	2	2	2	2	2	2	2		2	2	2	2	2	2	2	2	2	2	2	2	2	2	2	2	2	2	2
	Q42-CMA4-g: Scope for private funding in the project	1	1	1	1	1	1	1	1	1	1	1		1	1	1	1	1	1	1	2	2	2	2	2	2	1	1	1	1	1	1
CMA5- Economic Domain Management	Q43-CMA5-a: Existence of feasibility study before project planning.	2	2	2	2	2	2	2	2	2	2	2		2	2	2	2	2	2	2	2	2	2	2	2	2	2	2	2	2	2	2
	Q44-CMA5-b: Existence of demand forecasting in project planning.	2	2	2	2	2	2	2	2	2	2	2		1	1	1	1	1	1	1	1	1	1	1	1	1	1	2	2	2	2	2
	Q45-CMA5-c: Effectiveness of the project for meeting long term demand.	2	2	2	2	2	2	2	2	2	2	2		2	2	2	2	2	2	2	2	2	2	2	2	2	2	2	2	2	2	2
	Q46-CMA5-d: Scope of extension service delivery.	2	2	2	2	2	2	2	2	2	2	2		2	2	2	2	2	2	2	2	2	2	2	2	2	2	2	2	2	2	2
	Q47-CMA5-e: Scope of common-pool resource management.	2	2	2	1	1	1	1	1	1	1	1		2	1	1	1	1	1	1	1	1	1	1	1	1	1	1	1	1	1	1
	Q48-CMA5-f: Scope for financial auditing.	2	2	2	2	2	2	2	2	2	2	2		2	2	2	2	2	2	2	2	2	2	2	2	2	2	2	2	2	2	2
	Q49-CMA5-g: Project inducing stability to the economic environment.	2	2	2	2	2	2	2	2	2	2	2		2	2	2	2	2	2	2	2	2	2	2	2	2	2	2	2	2	2	2
CMA6- Socio-Cultural Domain Management	Q50-CMA6-a: Value addition to the socio-cultural cohesion.	2	2	2	2	2	2	2	2	2	2	2		2	2	2	2	2	2	2	2	2	2	2	2	2	2	2	2	2	2	2
	Q51-CMA6-b: Equitable service delivery	2	2	2	2	2	2	2	2	2	2	2		2	2	2	2	2	2	2	2	2	2	2	2	2	2	2	2	2	2	2
	Q52-CMA6-c: Inducing jobs opportunities.	2	2	2	2	2	2	2	2	2	2	2		2	2	2	2	2	2	2	2	2	2	2	2	2	2	2	2	2	2	2
	Q53-CMA6-d: Effective rehabilitation/ compensation policies	2	2	2	2	2	2	2	2	2	2	2		2	2	2	2	2	2	2	2	2	2	2	2	2	2	2	2	2	2	2
	Q54-CMA6-e: Scoping for social return on investment.	2	2	2	2	2	1	1	1	1	1	1		1	1	1	1	1	1	1	1	1	1	1	1	1	1	1	1	1	1	1
	Q55-CMA6-f: Acceptable tariffs/ levies.	2	2	2	2	2	2	2	2	2	2	2		2	2	2	2	2	2	2	2	2	2	2	2	2	2	2	2	2	2	2
	Q56-CMA6-g: Encouraging constructive migration of people	2	2	2	2	2	2	2	2	2	2	2		2	2	2	2	2	2	2	2	2	2	2	2	2	2	2	2	2	2	2
CMA7- Environmental Domain Management	Q57-CMA7-a: Initiating environmental sustainability.	2	2	2	2	2	2	2	2	2	2	2		2	2	2	2	2	2	2	2	2	2	2	2	2	2	2	2	2	2	2
	Q58-CMA7-b: Inducing soil degradation prevention	2	2	2	2	2	2	2	2	2	2	2		2	2	2	2	2	2	2	2	2	2	2	2	2	2	2	2	2	2	2
	Q59-CMA7-c: Emphasise for pollution prevention.	2	2	2	2	2	2	2	2	2	2	2		2	2	2	2	2	2	2	2	2	2	2	2	2	2	2	2	2	2	2
CMA8- Developmental Domain Management	Q60-CMA8-a: Arranging developmental training and workshops for stakeholders.	2	2	2	2	2	2	2	2	2	2	2		2	2	2	2	2	2	2	2	2	2	2	2	2	2	2	2	2	2	2
	Q61-CMA8-b: Demonstrating evidence of enhanced capability/ resource utilisation.	2	2	2	2	2	2	2	2	2	2	2		2	2	2	2	2	2	2	2	2	2	2	2	2	2	2	2	2	2	2
	Q62-CMA8-c: Encouraging Case study/ analysis/ qualitative feedback amongst stakeholders.	2	2	2	2	2	2	2	2	2	2	2		2	2	2	2	2	2	2	2	2	2	2	2	2	2	2	2	2	2	2
	Q63-CMA8-d: Effort for controlling staff/ stakeholders performance/ engagements.	2	2	2	2	2	2	2	2	2	2	2		2	2	2	2	2	2	2	2	2	2	2	2	2	2	2	2	2	2	2
	Q64-CMA8-e: Scoping knowledge/ best practices management.	2	2	2	2	2	2	2	2	2	2	2		2	2	2	2	2	2	2	2	2	2	2	2	2	2	2	2	2	2	2
	Q65-CMA8-f: Introducing rating policy.	2	2	2	2	2	1	1	1	1	1	1		1	1	1	1	1	1	1	1	1	1	1	1	1	1	1	1	1	1	1
	Total Not Agreed	2	2	1	2	4	7	7	7	7	9	10	0	10	11	12	12	12	12	12	11	11	11	11	11	11	12	11	11	11	12	12
	Total Agreed	63	63	64	63	61	58	58	58	58	56	55	0	55	54	53	53	53	53	53	54	54	54	54	54	54	53	54	54	54	53	53
			Cronbach's Alpha Gr1													Cronbach's Alpha Gr2
			#NAME?													#NAME?
			Cronbach's Alpha with missing item													Cronbach's Alpha with missing item
			#NAME?	#NAME?	#NAME?	#NAME?	#NAME?	#NAME?	#NAME?	#NAME?	#NAME?	#NAME?	#NAME?			#NAME?	#NAME?	#NAME?	#NAME?	#NAME?	#NAME?	#NAME?	#NAME?	#NAME?	#NAME?	#NAME?	#NAME?	#NAME?	#NAME?	#NAME?	#NAME?	#NAME?	#NAME?	#NAME?
			Anova: Two-Factor Without Replication Gr1													Anova: Two-Factor Without Replication Gr2
			SUMMARY	Count	Sum	Average	Variance	sd	cov							SUMMARY	Count	Sum	Average	Variance	sd	cov
			Row 1	11	22	2	0	0	0							Row 1	19	38	2	0	0	0
			Row 2	11	22	2	0	0	0							Row 2	19	38	2	0	0	0
			Row 3	11	22	2	0	0	0							Row 3	19	38	2	0	0	0
			Row 4	11	16	1.45455	0.272727	0.522233	0.359035							Row 4	19	19	1	0	0	0
			Row 5	11	22	2	0	0	0							Row 5	19	38	2	0	0	0
			Row 6	11	22	2	0	0	0							Row 6	19	38	2	0	0	0
			Row 7	11	22	2	0	0	0							Row 7	19	36	1.89474	0.0994152	0.315302	0.166409
			Row 8	11	17	1.54545	0.272727	0.522233	0.337915							Row 8	19	19	1	0	0	0
			Row 9	11	22	2	0	0	0							Row 9	19	38	2	0	0	0
			Row 10	11	22	2	0	0	0							Row 10	19	38	2	0	0	0
			Row 11	11	21	1.90909	0.0909091	0.301511	0.157935							Row 11	19	19	1	0	0	0
			Row 12	11	22	2	0	0	0							Row 12	19	38	2	0	0	0
			Row 13	11	22	2	0	0	0							Row 13	19	38	2	0	0	0
			Row 14	11	22	2	0	0	0							Row 14	19	21	1.10526	0.0994152	0.315302	0.285273
			Row 15	11	22	2	0	0	0							Row 15	19	38	2	0	0	0
			Row 16	11	22	2	0	0	0							Row 16	19	38	2	0	0	0
			Row 17	11	22	2	0	0	0							Row 17	19	38	2	0	0	0
			Row 18	11	22	2	0	0	0							Row 18	19	38	2	0	0	0
			Row 19	11	22	2	0	0	0							Row 19	19	38	2	0	0	0
			Row 20	11	22	2	0	0	0							Row 20	19	38	2	0	0	0
			Row 21	11	22	2	0	0	0							Row 21	19	38	2	0	0	0
			Row 22	11	16	1.45455	0.272727	0.522233	0.359035							Row 22	19	19	1	0	0	0
			Row 23	11	22	2	0	0	0							Row 23	19	38	2	0	0	0
			Row 24	11	22	2	0	0	0							Row 24	19	38	2	0	0	0
			Row 25	11	15	1.36364	0.254545	0.504525	0.369985							Row 25	19	19	1	0	0	0
			Row 26	11	20	1.81818	0.163636	0.40452	0.222486							Row 26	19	19	1	0	0	0
			Row 27	11	22	2	0	0	0							Row 27	19	38	2	0	0	0
			Row 28	11	22	2	0	0	0							Row 28	19	38	2	0	0	0
			Row 29	11	22	2	0	0	0							Row 29	19	38	2	0	0	0
			Row 30	11	22	2	0	0	0							Row 30	19	38	2	0	0	0
			Row 31	11	22	2	0	0	0							Row 31	19	38	2	0	0	0
			Row 32	11	22	2	0	0	0							Row 32	19	38	2	0	0	0
			Row 33	11	22	2	0	0	0							Row 33	19	38	2	0	0	0
			Row 34	11	22	2	0	0	0							Row 34	19	38	2	0	0	0
			Row 35	11	22	2	0	0	0							Row 35	19	38	2	0	0	0
			Row 36	11	22	2	0	0	0							Row 36	19	38	2	0	0	0
			Row 37	11	22	2	0	0	0							Row 37	19	38	2	0	0	0
			Row 38	11	22	2	0	0	0							Row 38	19	38	2	0	0	0
			Row 39	11	22	2	0	0	0							Row 39	19	38	2	0	0	0
			Row 40	11	22	2	0	0	0							Row 40	19	38	2	0	0	0
			Row 41	11	22	2	0	0	0							Row 41	19	38	2	0	0	0
			Row 42	11	11	1	0	0	0							Row 42	19	25	1.31579	0.22807	0.477567	0.362951
			Row 43	11	22	2	0	0	0							Row 43	19	38	2	0	0	0
			Row 44	11	22	2	0	0	0							Row 44	19	24	1.26316	0.204678	0.452414	0.358161
			Row 45	11	22	2	0	0	0							Row 45	19	38	2	0	0	0
			Row 46	11	22	2	0	0	0							Row 46	19	38	2	0	0	0
			Row 47	11	14	1.27273	0.218182	0.467099	0.367007							Row 47	19	20	1.05263	0.0526316	0.229416	0.217945
			Row 48	11	22	2	0	0	0							Row 48	19	38	2	0	0	0
			Row 49	11	22	2	0	0	0							Row 49	19	38	2	0	0	0
			Row 50	11	22	2	0	0	0							Row 50	19	38	2	0	0	0
			Row 51	11	22	2	0	0	0							Row 51	19	38	2	0	0	0
			Row 52	11	22	2	0	0	0							Row 52	19	38	2	0	0	0
			Row 53	11	22	2	0	0	0							Row 53	19	38	2	0	0	0
			Row 54	11	16	1.45455	0.272727	0.522233	0.359035							Row 54	19	19	1	0	0	0
			Row 55	11	22	2	0	0	0							Row 55	19	38	2	0	0	0
			Row 56	11	22	2	0	0	0							Row 56	19	38	2	0	0	0
			Row 57	11	22	2	0	0	0							Row 57	19	38	2	0	0	0
			Row 58	11	22	2	0	0	0							Row 58	19	38	2	0	0	0
			Row 59	11	22	2	0	0	0							Row 59	19	38	2	0	0	0
			Row 60	11	22	2	0	0	0							Row 60	19	38	2	0	0	0
			Row 61	11	22	2	0	0	0							Row 61	19	38	2	0	0	0
			Row 62	11	22	2	0	0	0							Row 62	19	38	2	0	0	0
			Row 63	11	22	2	0	0	0							Row 63	19	38	2	0	0	0
			Row 64	11	22	2	0	0	0							Row 64	19	38	2	0	0	0
			Row 65	11	16	1.45455	0.272727	0.522233	0.359035							Row 65	19	19	1	0	0	0
			Column 1	65	128	1.96923	0.0302885									Column 1	65	120	1.84615	0.132212
			Column 2	65	128	1.96923	0.0302885									Column 2	65	119	1.83077	0.142788
			Column 3	65	129	1.98462	0.0153846									Column 3	65	118	1.81538	0.152885
			Column 4	65	128	1.96923	0.0302885									Column 4	65	118	1.81538	0.152885
			Column 5	65	126	1.93846	0.0586538									Column 5	65	118	1.81538	0.152885
			Column 6	65	123	1.89231	0.0975962									Column 6	65	118	1.81538	0.152885
			Column 7	65	123	1.89231	0.0975962									Column 7	65	118	1.81538	0.152885
			Column 8	65	123	1.89231	0.0975962									Column 8	65	119	1.83077	0.142788
			Column 9	65	123	1.89231	0.0975962									Column 9	65	119	1.83077	0.142788
			Column 10	65	121	1.86154	0.121154									Column 10	65	119	1.83077	0.142788
			Column 11	65	120	1.84615	0.132212									Column 11	65	119	1.83077	0.142788
																Column 12	65	119	1.83077	0.142788
																Column 13	65	119	1.83077	0.142788
			ANOVA													Column 14	65	118	1.81538	0.152885
			Source of Variation	SS	df	MS	F	P-value	F crit							Column 15	65	119	1.83077	0.142788
			Rows	32.386	64	0.506031	16.7215	3.27827e-99	1.32933							Column 16	65	119	1.83077	0.142788
			Columns	1.54126	10	0.154126	5.09301	3.57512e-07	1.84548							Column 17	65	119	1.83077	0.142788
			Error	19.3678	640	0.0302622										Column 18	65	118	1.81538	0.152885
																Column 19	65	118	1.81538	0.152885
			Total	53.2951	714
			Chronbach's Alpha by Excel Gr1	0.940197												ANOVA
																Source of Variation	SS	df	MS	F	P-value	F crit
			Cronbach's Alpha Gr1													Rows	165.906	64	2.59228	244.439	0	1.31965
																Columns	0.0987854	18	0.00548808	0.517497	0.951292	1.61281
			#NAME?													Error	12.217	1152	0.010605
			Cronbach's Alpha with missing item													Total	178.222	1234
			#NAME?	#NAME?	#NAME?	#NAME?	#NAME?	#NAME?	#NAME?	#NAME?	#NAME?	#NAME?	#NAME?
			T Test: One Sample on COV Gr1													T Test: One Sample on COV Gr2
			SUMMARY			Alpha	0.05									SUMMARY			Alpha	0.05
			Count	Mean	Std Dev	Std Err	t	df	Cohen d	Effect r						Count	Mean	Std Dev	Std Err	t	df	Cohen d	Effect r
			65	0.0444841	0.115055	0.0142708	3.11713	64	0.386633	0.363055						65	0.021396	0.0777445	0.00964302	2.21881	64	0.275209	0.267262
			T TEST			Hyp Mean	0									T TEST			Hyp Mean	0
				p-value	t-crit	lower	upper	sig									p-value	t-crit	lower	upper	sig
			One Tail	0.00136741	1.66901			yes								One Tail	0.0150265	1.66901			yes
			Two Tail	0.00273483	1.99773	0.0159748	0.0729934	yes								Two Tail	0.0300531	1.99773	0.00213185	0.0406601	yes
			t-Test: Two-Sample Assuming Unequal Variances by Excel					T Test: Two Independent Samples by Real st
				Variable 1	Variable 2			SUMMARY			Hyp Mean Diff	0
			Mean	1.91888	1.8251			Groups	Count	Mean	Variance	Cohen d
			Variance	0.0460029	0.136436			Group 1	65	1.91888	0.0460029
			Observations	65	65			Group 2	65	1.8251	0.136436
			Hypothesized Mean Difference	0				Pooled			0.0912194	0.310503
			df	103
			t Stat	1.77014				T TEST: Equal Variances				Alpha	0.05
			P(T<=t) one-tail	0.0398313					std err	t-stat	df	p-value	t-crit	lower	upper	sig	effect r
			t Critical one-tail	1.65978				One Tail	0.0529788	1.77014	128	0.0395422	1.65685			yes	0.154579
			P(T<=t) two-tail	0.0796625				Two Tail	0.0529788	1.77014	128	0.0790844	1.97867	-0.0110476	0.198607	no	0.154579
			t Critical two-tail	1.98326
								T TEST: Unequal Variances				Alpha	0.05
									std err	t-stat	df	p-value	t-crit	lower	upper	sig	effect r
								One Tail	0.0529788	1.77014	102.753	#NAME?	#NAME?			#NAME?	0.172024
								Two Tail	0.0529788	1.77014	102.753	#NAME?	#NAME?	#NAME?	#NAME?	#NAME?	0.172024
[truncated: 16 more columns]

## Sheet: Pearson Spearman
Anova: Two-Factor Without Replication Gr1													Anova: Two-Factor Without Replication Gr2									Pearson by Excel		Spearman by Excel		Spearman and Pearson by Real St
SUMMARY	Count	Sum	Average	Variance	sd	cov	Rank						SUMMARY	Count	Sum	Average	Variance	sd	cov	Rank
Row 1	11	22	2	0	0	0	1						Row 1	19	38	2	0	0	0	1		0.788205		0.86277
Row 2	11	22	2	0	0	0	1						Row 2	19	38	2	0	0	0	1
Row 3	11	22	2	0	0	0	1						Row 3	19	38	2	0	0	0	1						Pearson	0.788205
Row 4	11	16	1.45455	0.272727	0.522233	0.359035	59						Row 4	19	19	1	0	0	0	58						Spearman	#NAME?
Row 5	11	22	2	0	0	0	1						Row 5	19	38	2	0	0	0	1						Kendall	#NAME?
Row 6	11	22	2	0	0	0	1						Row 6	19	38	2	0	0	0	1
Row 7	11	22	2	0	0	0	1						Row 7	19	36	1.89474	0.0994152	0.315302	0.166409	53						Spearman's coefficient (test)
Row 8	11	17	1.54545	0.272727	0.522233	0.337915	58						Row 8	19	19	1	0	0	0	58
Row 9	11	22	2	0	0	0	1						Row 9	19	38	2	0	0	0	1						Alpha	0.05
Row 10	11	22	2	0	0	0	1						Row 10	19	38	2	0	0	0	1						Tails	2
Row 11	11	21	1.90909	0.0909091	0.301511	0.157935	56						Row 11	19	19	1	0	0	0	58
Row 12	11	22	2	0	0	0	1						Row 12	19	38	2	0	0	0	1						#NAME?	#NAME?
Row 13	11	22	2	0	0	0	1						Row 13	19	38	2	0	0	0	1						#NAME?	#NAME?
Row 14	11	22	2	0	0	0	1						Row 14	19	21	1.10526	0.0994152	0.315302	0.285273	56						#NAME?	#NAME?
Row 15	11	22	2	0	0	0	1						Row 15	19	38	2	0	0	0	1
Row 16	11	22	2	0	0	0	1						Row 16	19	38	2	0	0	0	1
Row 17	11	22	2	0	0	0	1						Row 17	19	38	2	0	0	0	1			Comments
Row 18	11	22	2	0	0	0	1						Row 18	19	38	2	0	0	0	1			Pearson by Excel and Real statistics are same
Row 19	11	22	2	0	0	0	1						Row 19	19	38	2	0	0	0	1			Spearman by Excel and Real statistics are slightly different (about 2%)
Row 20	11	22	2	0	0	0	1						Row 20	19	38	2	0	0	0	1
Row 21	11	22	2	0	0	0	1						Row 21	19	38	2	0	0	0	1
Row 22	11	16	1.45455	0.272727	0.522233	0.359035	59						Row 22	19	19	1	0	0	0	58
Row 23	11	22	2	0	0	0	1						Row 23	19	38	2	0	0	0	1
Row 24	11	22	2	0	0	0	1						Row 24	19	38	2	0	0	0	1
Row 25	11	15	1.36364	0.254545	0.504525	0.369985	63						Row 25	19	19	1	0	0	0	58
Row 26	11	20	1.81818	0.163636	0.40452	0.222486	57						Row 26	19	19	1	0	0	0	58
Row 27	11	22	2	0	0	0	1						Row 27	19	38	2	0	0	0	1
Row 28	11	22	2	0	0	0	1						Row 28	19	38	2	0	0	0	1
Row 29	11	22	2	0	0	0	1						Row 29	19	38	2	0	0	0	1
Row 30	11	22	2	0	0	0	1						Row 30	19	38	2	0	0	0	1
Row 31	11	22	2	0	0	0	1						Row 31	19	38	2	0	0	0	1
Row 32	11	22	2	0	0	0	1						Row 32	19	38	2	0	0	0	1
Row 33	11	22	2	0	0	0	1						Row 33	19	38	2	0	0	0	1
Row 34	11	22	2	0	0	0	1						Row 34	19	38	2	0	0	0	1
Row 35	11	22	2	0	0	0	1						Row 35	19	38	2	0	0	0	1
Row 36	11	22	2	0	0	0	1						Row 36	19	38	2	0	0	0	1
Row 37	11	22	2	0	0	0	1						Row 37	19	38	2	0	0	0	1
Row 38	11	22	2	0	0	0	1						Row 38	19	38	2	0	0	0	1
Row 39	11	22	2	0	0	0	1						Row 39	19	38	2	0	0	0	1
Row 40	11	22	2	0	0	0	1						Row 40	19	38	2	0	0	0	1
Row 41	11	22	2	0	0	0	1						Row 41	19	38	2	0	0	0	1
Row 42	11	11	1	0	0	0	65						Row 42	19	25	1.31579	0.22807	0.477567	0.362951	54
Row 43	11	22	2	0	0	0	1						Row 43	19	38	2	0	0	0	1
Row 44	11	22	2	0	0	0	1						Row 44	19	24	1.26316	0.204678	0.452414	0.358161	55
Row 45	11	22	2	0	0	0	1						Row 45	19	38	2	0	0	0	1
Row 46	11	22	2	0	0	0	1						Row 46	19	38	2	0	0	0	1
Row 47	11	14	1.27273	0.218182	0.467099	0.367007	64						Row 47	19	20	1.05263	0.0526316	0.229416	0.217945	57
Row 48	11	22	2	0	0	0	1						Row 48	19	38	2	0	0	0	1
Row 49	11	22	2	0	0	0	1						Row 49	19	38	2	0	0	0	1
Row 50	11	22	2	0	0	0	1						Row 50	19	38	2	0	0	0	1
Row 51	11	22	2	0	0	0	1						Row 51	19	38	2	0	0	0	1
Row 52	11	22	2	0	0	0	1						Row 52	19	38	2	0	0	0	1
Row 53	11	22	2	0	0	0	1						Row 53	19	38	2	0	0	0	1
Row 54	11	16	1.45455	0.272727	0.522233	0.359035	59						Row 54	19	19	1	0	0	0	58
Row 55	11	22	2	0	0	0	1						Row 55	19	38	2	0	0	0	1
Row 56	11	22	2	0	0	0	1						Row 56	19	38	2	0	0	0	1
Row 57	11	22	2	0	0	0	1						Row 57	19	38	2	0	0	0	1
Row 58	11	22	2	0	0	0	1						Row 58	19	38	2	0	0	0	1
Row 59	11	22	2	0	0	0	1						Row 59	19	38	2	0	0	0	1
Row 60	11	22	2	0	0	0	1						Row 60	19	38	2	0	0	0	1
Row 61	11	22	2	0	0	0	1						Row 61	19	38	2	0	0	0	1
Row 62	11	22	2	0	0	0	1						Row 62	19	38	2	0	0	0	1
Row 63	11	22	2	0	0	0	1						Row 63	19	38	2	0	0	0	1
Row 64	11	22	2	0	0	0	1						Row 64	19	38	2	0	0	0	1
Row 65	11	16	1.45455	0.272727	0.522233	0.359035	59						Row 65	19	19	1	0	0	0	58

## Sheet: Gr1 Gr2 cov rank
Anova: Two-Factor Without Replication Gr1													Anova: Two-Factor Without Replication Gr2												Pearson by Excel	Spearman by Excel	Spearman by Real St
SUMMARY	Count	Sum	Average	Variance	sd	cov	cov rank						SUMMARY	Count	Sum	Average	Variance	sd	cov	Rank
Row 25	11	15	1.36364	0.254545	0.504525	0.369985	1						Row 42	19	25	1.31579	0.22807	0.477567	0.362951	1					#REF!	#REF!	Correlation Coefficients
Row 47	11	14	1.27273	0.218182	0.467099	0.367007	2						Row 44	19	24	1.26316	0.204678	0.452414	0.358161	2
Row 4	11	16	1.45455	0.272727	0.522233	0.359035	3						Row 14	19	21	1.10526	0.0994152	0.315302	0.285273	3							Pearson	#REF!
Row 22	11	16	1.45455	0.272727	0.522233	0.359035	3						Row 47	19	20	1.05263	0.0526316	0.229416	0.217945	4							Spearman	#NAME?
Row 54	11	16	1.45455	0.272727	0.522233	0.359035	3						Row 7	19	36	1.89474	0.0994152	0.315302	0.166409	5							Kendall	#NAME?
Row 65	11	16	1.45455	0.272727	0.522233	0.359035	3						Row 1	19	38	2	0	0	0	6
Row 8	11	17	1.54545	0.272727	0.522233	0.337915	7						Row 2	19	38	2	0	0	0	6							Spearman's coefficient (test)
Row 26	11	20	1.81818	0.163636	0.40452	0.222486	8						Row 3	19	38	2	0	0	0	6
Row 11	11	21	1.90909	0.0909091	0.301511	0.157935	9						Row 4	19	19	1	0	0	0	6							Alpha	0.05
Row 1	11	22	2	0	0	0	10						Row 5	19	38	2	0	0	0	6							Tails	2
Row 2	11	22	2	0	0	0	10						Row 6	19	38	2	0	0	0	6
Row 3	11	22	2	0	0	0	10						Row 8	19	19	1	0	0	0	6							#NAME?	#NAME?
Row 5	11	22	2	0	0	0	10						Row 9	19	38	2	0	0	0	6							#NAME?	#NAME?
Row 6	11	22	2	0	0	0	10						Row 10	19	38	2	0	0	0	6							#NAME?	#NAME?
Row 7	11	22	2	0	0	0	10						Row 11	19	19	1	0	0	0	6
Row 9	11	22	2	0	0	0	10						Row 12	19	38	2	0	0	0	6
Row 10	11	22	2	0	0	0	10						Row 13	19	38	2	0	0	0	6
Row 12	11	22	2	0	0	0	10						Row 15	19	38	2	0	0	0	6
Row 13	11	22	2	0	0	0	10						Row 16	19	38	2	0	0	0	6
Row 14	11	22	2	0	0	0	10						Row 17	19	38	2	0	0	0	6
Row 15	11	22	2	0	0	0	10						Row 18	19	38	2	0	0	0	6
Row 16	11	22	2	0	0	0	10						Row 19	19	38	2	0	0	0	6
Row 17	11	22	2	0	0	0	10						Row 20	19	38	2	0	0	0	6
Row 18	11	22	2	0	0	0	10						Row 21	19	38	2	0	0	0	6
Row 19	11	22	2	0	0	0	10						Row 22	19	19	1	0	0	0	6
Row 20	11	22	2	0	0	0	10						Row 23	19	38	2	0	0	0	6
Row 21	11	22	2	0	0	0	10						Row 24	19	38	2	0	0	0	6
Row 23	11	22	2	0	0	0	10						Row 25	19	19	1	0	0	0	6
Row 24	11	22	2	0	0	0	10						Row 26	19	19	1	0	0	0	6
Row 27	11	22	2	0	0	0	10						Row 27	19	38	2	0	0	0	6
Row 28	11	22	2	0	0	0	10						Row 28	19	38	2	0	0	0	6
Row 29	11	22	2	0	0	0	10						Row 29	19	38	2	0	0	0	6
Row 30	11	22	2	0	0	0	10						Row 30	19	38	2	0	0	0	6
Row 31	11	22	2	0	0	0	10						Row 31	19	38	2	0	0	0	6
Row 32	11	22	2	0	0	0	10						Row 32	19	38	2	0	0	0	6
Row 33	11	22	2	0	0	0	10						Row 33	19	38	2	0	0	0	6
Row 34	11	22	2	0	0	0	10						Row 34	19	38	2	0	0	0	6
Row 35	11	22	2	0	0	0	10						Row 35	19	38	2	0	0	0	6
Row 36	11	22	2	0	0	0	10						Row 36	19	38	2	0	0	0	6
Row 37	11	22	2	0	0	0	10						Row 37	19	38	2	0	0	0	6
Row 38	11	22	2	0	0	0	10						Row 38	19	38	2	0	0	0	6
Row 39	11	22	2	0	0	0	10						Row 39	19	38	2	0	0	0	6
Row 40	11	22	2	0	0	0	10						Row 40	19	38	2	0	0	0	6
Row 41	11	22	2	0	0	0	10						Row 41	19	38	2	0	0	0	6
Row 42	11	11	1	0	0	0	10						Row 43	19	38	2	0	0	0	6
Row 43	11	22	2	0	0	0	10						Row 45	19	38	2	0	0	0	6
Row 44	11	22	2	0	0	0	10						Row 46	19	38	2	0	0	0	6
Row 45	11	22	2	0	0	0	10						Row 48	19	38	2	0	0	0	6
Row 46	11	22	2	0	0	0	10						Row 49	19	38	2	0	0	0	6
Row 48	11	22	2	0	0	0	10						Row 50	19	38	2	0	0	0	6
Row 49	11	22	2	0	0	0	10						Row 51	19	38	2	0	0	0	6
Row 50	11	22	2	0	0	0	10						Row 52	19	38	2	0	0	0	6
Row 51	11	22	2	0	0	0	10						Row 53	19	38	2	0	0	0	6
Row 52	11	22	2	0	0	0	10						Row 54	19	19	1	0	0	0	6
Row 53	11	22	2	0	0	0	10						Row 55	19	38	2	0	0	0	6
Row 55	11	22	2	0	0	0	10						Row 56	19	38	2	0	0	0	6
Row 56	11	22	2	0	0	0	10						Row 57	19	38	2	0	0	0	6
Row 57	11	22	2	0	0	0	10						Row 58	19	38	2	0	0	0	6
Row 58	11	22	2	0	0	0	10						Row 59	19	38	2	0	0	0	6
Row 59	11	22	2	0	0	0	10						Row 60	19	38	2	0	0	0	6
Row 60	11	22	2	0	0	0	10						Row 61	19	38	2	0	0	0	6
Row 61	11	22	2	0	0	0	10						Row 62	19	38	2	0	0	0	6
Row 62	11	22	2	0	0	0	10						Row 63	19	38	2	0	0	0	6
Row 63	11	22	2	0	0	0	10						Row 64	19	38	2	0	0	0	6
Row 64	11	22	2	0	0	0	10						Row 65	19	19	1	0	0	0	6
SUMMARY	Average	Variance	sd	cov	Rank in Group1						SUMMARY	Count	Sum	Average	Variance	sd	cov	Rank in Gr2
Row 25	1.36364	0.254545	0.504525	0.369985	1						Row 42	19	25	1.31579	0.22807	0.477567	0.362951	1
Row 47	1.27273	0.218182	0.467099	0.367007	2						Row 44	19	24	1.26316	0.204678	0.452414	0.358161	2
Row 4	1.45455	0.272727	0.522233	0.359035	3						Row 14	19	21	1.10526	0.0994152	0.315302	0.285273	3
Row 22	1.45455	0.272727	0.522233	0.359035	3						Row 47	19	20	1.05263	0.0526316	0.229416	0.217945	4
Row 54	1.45455	0.272727	0.522233	0.359035	3						Row 7	19	36	1.89474	0.0994152	0.315302	0.166409	5
Row 65	1.45455	0.272727	0.522233	0.359035	3
Row 8	1.54545	0.272727	0.522233	0.337915	7
Row 26	1.81818	0.163636	0.40452	0.222486	8
Row 11	1.90909	0.0909091	0.301511	0.157935	9

## Sheet: T test
	cov			Rank
SUMMARY	cov Gr1	cov Gr2	Rank Gr1	Rank Gr2
Row 1	0	0	1	1
Row 2	0	0	1	1
Row 3	0	0	1	1
Row 4	0.359035	0	56	55
Row 5	0	0	1	1
Row 6	0	0	1	1
Row 7	0	0.166409	1	48
Row 8	0.337915	0	52	52
Row 9	0	0	1	1
Row 10	0	0	1	1
Row 11	0.157935	0	48	50
Row 12	0	0	1	1
Row 13	0	0	1	1
Row 14	0	0.285273	1	46
Row 15	0	0	1	1
Row 16	0	0	1	1
Row 17	0	0	1	1
Row 18	0	0	1	1
Row 19	0	0	1	1
Row 20	0	0	1	1
Row 21	0	0	1	1
Row 22	0.359035	0	39	40
Row 23	0	0	1	1
Row 24	0	0	1	1
Row 25	0.369985	0	39	38
Row 26	0.222486	0	36	38
Row 27	0	0	1	1
Row 28	0	0	1	1
Row 29	0	0	1	1
Row 30	0	0	1	1
Row 31	0	0	1	1
Row 32	0	0	1	1
Row 33	0	0	1	1
Row 34	0	0	1	1
Row 35	0	0	1	1
Row 36	0	0	1	1
Row 37	0	0	1	1
Row 38	0	0	1	1
Row 39	0	0	1	1
Row 40	0	0	1	1
Row 41	0	0	1	1
Row 42	0	0.362951	24	20
Row 43	0	0	1	1
Row 44	0	0.358161	1	19
Row 45	0	0	1	1
Row 46	0	0	1	1
Row 47	0.367007	0.217945	19	17
Row 48	0	0	1	1
Row 49	0	0	1	1
Row 50	0	0	1	1
Row 51	0	0	1	1
Row 52	0	0	1	1
Row 53	0	0	1	1
Row 54	0.359035	0	11	11
Row 55	0	0	1	1
Row 56	0	0	1	1
Row 57	0	0	1	1
Row 58	0	0	1	1
Row 59	0	0	1	1
Row 60	0	0	1	1
Row 61	0	0	1	1
Row 62	0	0	1	1
Row 63	0	0	1	1
Row 64	0	0	1	1
Row 65	0.359035	0	1	1
Gr1								Gr2
SUMMARY	Average	Variance	sd	cov	Rank in Group1			SUMMARY	Count	Sum	Average	Variance	sd	cov	Rank in Gr2
Row 25	1.36364	0.254545	0.504525	0.369985	39			Row 42	19	25	1.31579	0.22807	0.477567	0.362951	20
Row 47	1.27273	0.218182	0.467099	0.367007	19			Row 44	19	24	1.26316	0.204678	0.452414	0.358161	19
Row 4	1.45455	0.272727	0.522233	0.359035	56			Row 14	19	21	1.10526	0.0994152	0.315302	0.285273	46
Row 22	1.45455	0.272727	0.522233	0.359035	39			Row 47	19	20	1.05263	0.0526316	0.229416	0.217945	17
Row 54	1.45455	0.272727	0.522233	0.359035	11			Row 7	19	36	1.89474	0.0994152	0.315302	0.166409	48
Row 65	1.45455	0.272727	0.522233	0.359035	1
Row 8	1.54545	0.272727	0.522233	0.337915	52
Row 26	1.81818	0.163636	0.40452	0.222486	36
Row 11	1.90909	0.0909091	0.301511	0.157935	48
Krippendorff's Alpha Gr1					Krippendorff's Alpha Gr2
Alpha	0.05				Alpha	0.05
Subj Factor	0				Subj Factor	0
Rater Factor	0				Rater Factor	0
kalpha	0.569044				kalpha	0.926837
s.e. subj	0.0882856				s.e. subj	0.0335469
lower	0.392674				lower	0.859819
upper	0.745415				upper	0.993854
s.e. tot	0.126083				s.e. tot	0.0361941
lower	0.317165				lower	0.854531
upper	0.820923				upper	0.999143
Summary agreement Table
			Both	Gr1	Gr2
Total Full Agreement Both Gr			52	55	52
Total Not in Agreement Both Gr			13	10	13
Total Percentage of Agreement			80	84.6154	80
Total Percentage of Non-Agreement			20	15.3846	20
Cronbach's Alpha Gr1			Cronbach's Alpha Gr2
0.940197			0.995909
T Test: One Sample on COV Gr1													T Test: One Sample on COV Gr2
SUMMARY			Alpha	0.05									SUMMARY			Alpha	0.05
Count	Mean	Std Dev	Std Err	t	df	Cohen d	Effect r						Count	Mean	Std Dev	Std Err	t	df	Cohen d	Effect r
65	0.0444841	0.115055	0.0142708	3.11713	64	0.386633	0.363055						65	0.021396	0.0777445	0.00964302	2.21881	64	0.275209	0.267262
T TEST			Hyp Mean	0									T TEST			Hyp Mean	0
	p-value	t-crit	lower	upper	sig									p-value	t-crit	lower	upper	sig
One Tail	0.00136741	1.66901			yes								One Tail	0.0150265	1.66901			yes
Two Tail	0.00273483	1.99773	0.0159748	0.0729934	yes								Two Tail	0.0300531	1.99773	0.00213185	0.0406601	yes
T Test: Two Independent Samples by Real st
SUMMARY			Hyp Mean Diff	0
Groups	Count	Mean	Variance	Cohen d
Group 1	65	1.91888	0.0460029
Group 2	65	1.8251	0.136436
Pooled			0.0912194	0.310503
T TEST: Equal Variances				Alpha	0.05
	std err	t-stat	df	p-value	t-crit	lower	upper	sig	effect r
One Tail	0.0529788	1.77014	128	0.0395422	1.65685			yes	0.154579
Two Tail	0.0529788	1.77014	128	0.0790844	1.97867	-0.0110476	0.198607	no	0.154579
T TEST: Unequal Variances				Alpha	0.05
	std err	t-stat	df	p-value	t-crit	lower	upper	sig	effect r
One Tail	0.0529788	1.77014	102.753	0.0398348	1.65982			yes	0.172024
Two Tail	0.0529788	1.77014	102.753	0.0796696	1.98332	-0.011294	0.198854	no	0.172024
